# Supplementary material for: The structure of the TH/INS locus and the parental allele expressed are not conserved between mammals
Source: PubMed Central journal article supplement (PMC11222543; doi:10.1038/s41437-024-00689-y), 2024-06-04
Supplement: 41437_2024_689_MOESM1_ESM.pdf [file 41437_2024_689_MOESM1_ESM.pdf]

## Supplementary information

| Name                | Assembly                               | Accession        | <i>TH</i> -to- <i>INS</i><br>(bp) | Mouse<br>diverge<br>(mya) |
|---------------------|----------------------------------------|------------------|-----------------------------------|---------------------------|
| African clawed frog | Xenopus.laevis_v10.1                   | GCA_017654675.1  | 13953                             | 352                       |
| African elephant    | Loxafr3.0                              | GCA_000001905.1  | 2831                              | 99                        |
| Antechinus          | AdamAnt_v2                             | GCA_016432865.2  | 5902                              | 160                       |
| Armadillo           | mDasNov1.hap2                          | GCA_030445035.1  | 1876                              | 99                        |
| Bearded dragon      | pvi1.1                                 | GCA_900067755.1  | 48137                             | 319                       |
| Cattle              | ARS-UCD2.0                             | GCA_002263795.4  | 1977                              | 94                        |
| Chicken             | bGalGal1.mat<br>.broiler.GRCg7b        | GCA_016699485.1  | 14733                             | 319                       |
| Chimpanzee          | NHGRI_mPanTro3-<br>v1.1-hic.freeze_pri | GCA_028858775.1  | 2250                              | 87                        |
| Chinchilla          | ChiLan1.0                              | GCA_000276665.1  | 33171                             | 70                        |
| Chinese hamster     | CriGri_1.0                             | GCA_000223135.1  | 39138                             | 26                        |
| Degu                | OctDeg1.0                              | GCA_000260255.1  | 6176                              | 70                        |
| Dog                 | UU_Cfam_GSD_1.0                        | GCA_011100685.1  | 2203                              | 94                        |
| Echidna             | mTacAcu1                               | GCA_015852505.1  | 22011                             | 180                       |
| Elephant shark      | IMCB_Cmil_1.0                          | GCA_018977255.1  | 7852                              | 462                       |
| Garnett's galago    | OtoGar3                                | GCA_000181295.3  | 2390                              | 87                        |
| Golden hamster      | BCM_Maur_2.0                           | GCA_017639785.1  | 36627                             | 26                        |
| Green anole         | AnoCar2.0                              | GCA_000090745.2  | 28715                             | 319                       |
| Guinea pig          | Cavpor3.0                              | GCA_000151735.1  | 4586                              | 70                        |
| Horse               | EquCab3.0                              | GCA_002863925.1  | 2002                              | 94                        |
| House mouse         | GRCm39                                 | GCA_000001635.9  | 213053                            | 0                         |
| Human               | GRCh38.p14                             | GCA_000001405.29 | 2720                              | 87                        |
| Jerboa              | mJacJac1.mat.Y.cur                     | GCA_020740685.1  | 38279                             | 53                        |
| Koala               | phaCin_unsw_v4.1                       | GCA_002099425.1  | 90                                | 160                       |
| Monito del Monte    | mDroGli1                               | GCA_019393635.1  | 2089                              | 160                       |
| Naked mole-rat      | HetGla_female_1.0                      | GCA_000247695.1  | 3038                              | 70                        |
| Palestine mole-rat  | S.galili_v1.0                          | GCA_000622305.1  | 87272                             | 44                        |
| Pig                 | Sscrofa11.1                            | GCA_000003025.6  | 1576                              | 94                        |
| Platypus            | mOrnAna1.pri.v4                        | GCA_004115215.4  | 12343                             | 180                       |
| Prairie deer mouse  | HU_Pman_2.1.3                          | GCA_003704035.3  | 160130                            | 26                        |
| Prairie vole        | MicOch1.0                              | GCA_000317375.1  | 70990                             | 26                        |
| Rat                 | mRatBN7.2                              | GCA_015227675.2  | 78978                             | 13                        |
| Red squirrel        | mSciVul1.1                             | GCA_902686455.1  | 1357392                           | 69                        |
| Ryukyu mouse        | CAROLI_EIJ_v1.1                        | GCA_900094665.2  | 202130                            | 4                         |
| Shrew mouse         | PAHARI_EIJ_v1.1                        | GCA_900095145.2  | 213968                            | 6                         |
| Striped gopher      | HiC_ltri_2                             | GCA_016881025.1  | 786210                            | 69                        |
| Tammar              | MeugV7.0                               | -                | 2649                              | 160                       |
| Turtle              | Chrysemys_picta<br>_BioNano-3.0.4      | GCA_000241765.5  | 11841                             | 319                       |
| Zebrafish           | GRCz11                                 | GCA_000002035.4  | 13780195                          | 429                       |

**Supplementary Table 1.** Genomes used for the species comparison of *TH* and *INS* separation. Divergence times from the house mouse provided by TimeTree 5.

| Name            | Sequence                     | Use                 | Reference     |
|-----------------|------------------------------|---------------------|---------------|
| TH-INS_primer_F | CCAGAGCCTTCTGGGGACCT         | Geno                | This study    |
| TH-INS_primer_R | CTCCCTAGTGGCCCTGCTCA         | Geno                | This study    |
| RvIntron-Ins    | GCAGGGAGAGGACAGGAAATC        | Geno                | Ager 2007     |
| Fw3UTR-Ins      | CTACCCCCAGGGCTTGACATG        | Geno                | Ager 2007     |
| TH-INS_F01      | TTCGTGTCAGAGAGCTTTAGCGATG    | Exp                 | Stringer 2012 |
| TH-INS_R01      | TCCGGCCTCACCCAACAGTG         | Exp                 | Stringer 2012 |
| INS_cDNA_Fw     | GCTCCATCTTCTTTTCTCACCTGTCTCT | Exp                 | Stringer 2012 |
| Q3INS_Rv        | TGGCCGCTAGTTGCAGTAAGTC       | Exp                 | Stringer 2012 |
| InclINS-TH_F01  | CCCTGGGCCTAGATACATTGGAGGA    | Geno/Exp/<br>3'RACE | This study    |
| InclINS-TH_R01  | GTGTAGTTCGGAAGCAGCCTCAGAG    | Geno/Exp            | This study    |
| InclINS-TH_R02  | CAGAGAGAACCAAACAGGATGGCGT    | 5'RACE              | This study    |
| MeTH_3utr_g_1_F | GACATGCCATAAGGGTCAGG         | Geno                | This study    |
| MeTH_3utr_g_1_R | GGTCTGCTCTGGGACACTTC         | Geno                | This study    |
| MeTH_3utr_c_1_F | GTCAGGGCAGGGATCTCAAT         | Exp                 | This study    |
| MeTH_3utr_c_1_R | CAGAGATCCGGGAGTTTGAC         | Exp                 | This study    |

**Supplementary Table 2.** Primers used in this study. "Geno": genotyping primers, "Expr": intron-spanning expression primers.

| Transcript     | Tissue   | Animal | SNP loc. | Major allele | Major signal | Minor allele | Minor signal | Mat. allele |
|----------------|----------|--------|----------|--------------|--------------|--------------|--------------|-------------|
| <i>TH</i>      | BOM      | 2      | 12       | T            | 188          | C            | 84           | C           |
| <i>TH</i>      | BOM      | 2      | 13       | A            | 505          | G            | 197          | G           |
| <i>TH</i>      | TOM      | 1      | 11       | T            | 303          | C            | 170          | C           |
| <i>TH</i>      | TOM      | 2      | 12       | T            | 347          | C            | 131          | C           |
| <i>TH</i>      | TOM      | 2      | 13       | A            | 499          | G            | 173          | G           |
| <i>TH</i>      | PY liver | 4      | 9        | C            | 213          | G            | 1            | A           |
| <i>TH</i>      | PY liver | 4      | 10       | C            | 259          | G            | 0            | G           |
| <i>TH</i>      | PY liver | 4      | 12       | T            | 336          | G            | 1            | C           |
| <i>TH</i>      | PY liver | 6      | 11       | T            | 370          | C            | 175          | C           |
| <i>TH</i>      | PY liver | 7      | 9        | C            | 359          | G            | 2            | A           |
| <i>TH</i>      | PY liver | 7      | 10       | C            | 462          | G            | 0            | G           |
| <i>TH</i>      | PY liver | 7      | 12       | T            | 379          | G            | 1            | C           |
| <i>TH</i>      | PY liver | 7      | 13       | A            | 584          | G            | 1            | G           |
| <i>TH</i>      | PY liver | 9      | 11       | C            | 317          | G            | 2            | T           |
| <i>TH</i>      | PY brain | 4      | 9        | C            | 180          | A            | 157          | A           |
| <i>TH</i>      | PY brain | 4      | 10       | C            | 186          | G            | 100          | G           |
| <i>TH</i>      | PY brain | 4      | 12       | C            | 171          | T            | 117          | C           |
| <i>TH</i>      | PY brain | 6      | 11       | C            | 210          | T            | 129          | C           |
| <i>TH</i>      | PY brain | 7      | 9        | A            | 240          | C            | 232          | A           |
| <i>TH</i>      | PY brain | 7      | 10       | C            | 190          | G            | 90           | G           |
| <i>TH</i>      | PY brain | 7      | 12       | T            | 186          | C            | 110          | C           |
| <i>TH</i>      | PY brain | 7      | 13       | A            | 412          | G            | 211          | G           |
| <i>TH</i>      | PY brain | 9      | 11       | C            | 182          | T            | 115          | T           |
| <i>TH-INS1</i> | PY liver | 4      | 1        | T            | 443          | A            | 58           | C           |
| <i>TH-INS1</i> | PY liver | 4      | 2        | A            | 345          | G            | 0            | G           |
| <i>TH-INS1</i> | PY liver | 4      | 2        | A            | 276          | T            | 3            | G           |
| <i>TH-INS1</i> | PY liver | 7      | 2        | A            | 293          | T            | 3            | G           |
| <i>TH-INS1</i> | PY liver | 8      | 1        | T            | 397          | C            | 106          | C           |
| <i>TH-INS2</i> | PY liver | 4      | 2        | G            | 391          | A            | 131          | G           |
| <i>TH-INS2</i> | PY liver | 7      | 2        | A            | 238          | G            | 93           | G           |
| <i>TH-INS2</i> | PY liver | 8      | 1        | T            | 311          | C            | 67           | C           |
| <i>InclNS</i>  | BOM      | 2      | 4        | T            | 303          | C            | 240          | C           |
| <i>InclNS</i>  | BOM      | 3      | 3        | T            | 215          | C            | 188          | T           |
| <i>InclNS</i>  | TOM      | 1      | 3        | T            | 235          | C            | 112          | C           |
| <i>InclNS</i>  | TOM      | 2      | 4        | T            | 452          | C            | 169          | C           |
| <i>InclNS</i>  | TOM      | 3      | 3        | C            | 269          | T            | 78           | T           |
| <i>InclNS</i>  | TOM      | 5      | 4        | C            | 309          | T            | 40           | T           |
| <i>InclNS</i>  | TOM      | 5      | 5        | A            | 685          | G            | 36           | G           |
| <i>InclNS</i>  | TOM      | 5      | 6        | C            | 436          | T            | 123          | T           |
| <i>InclNS</i>  | TOM      | 5      | 7        | A            | 218          | G            | 23           | G           |
| <i>InclNS</i>  | TOM      | 5      | 8        | T            | 441          | C            | 120          | C           |
| <i>InclNS</i>  | PY liver | 6      | 3        | T            | 253          | C            | 19           | C           |
| <i>InclNS</i>  | PY liver | 7      | 4        | T            | 452          | C            | 95           | C           |
| <i>InclNS</i>  | PY liver | 7      | 5        | G            | 498          | A            | 129          | A           |
| <i>InclNS</i>  | PY liver | 7      | 6        | T            | 292          | C            | 32           | C           |
| <i>InclNS</i>  | PY liver | 7      | 7        | G            | 431          | A            | 85           | A           |
| <i>InclNS</i>  | PY liver | 7      | 8        | C            | 336          | T            | 24           | T           |
| <i>InclNS</i>  | PY liver | 9      | 3        | C            | 283          | G            | 16           | T           |
| <i>InclNS</i>  | PY brain | 6      | 3        | T            | 395          | C            | 377          | C           |
| <i>INS</i>     | PY liver | 4      | 1        | T            | 498          | A            | 34           | C           |
| <i>INS</i>     | PY liver | 4      | 2        | A            | 262          | G            | 0            | G           |
| <i>INS</i>     | PY liver | 7      | 2        | G            | 367          | A            | 131          | G           |
| <i>INS</i>     | PY liver | 8      | 1        | T            | 431          | A            | 3            | C           |
| <i>INS</i>     | PY brain | 4      | 1        | T            | 266          | C            | 91           | C           |
| <i>INS</i>     | PY brain | 4      | 2        | A            | 168          | G            | 124          | G           |
| <i>INS</i>     | PY brain | 8      | 1        | T            | 167          | C            | 122          | C           |

**Supplementary Table 3.** Allele-specific expression analysis. The chromatogram signals for the major and minor alleles, the maternal allele ("Mat. allele") indicates the parental origin. Replication is noted across particular animals and SNP locations ("SNP loc.").

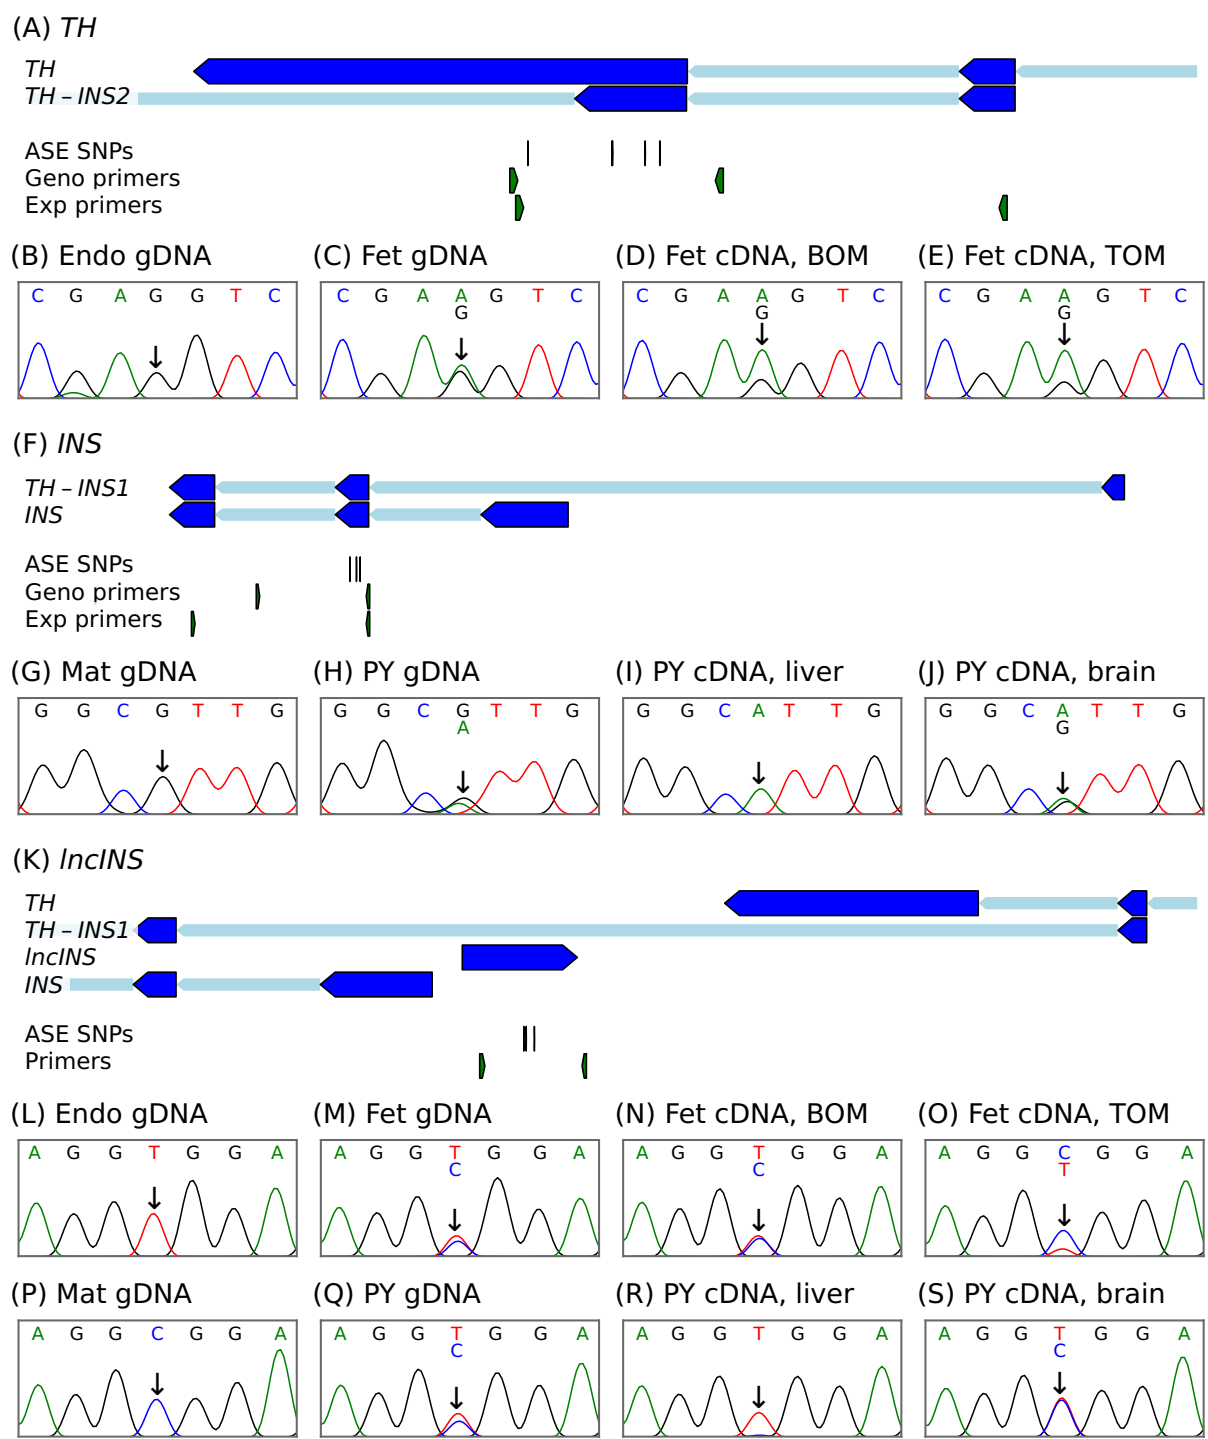

**Supplementary Fig. 1.** Paternal expression of the *TH/INS* locus. (A) Primer and SNP positions for allele-specific expression analysis of *TH*. The *TH* genotyping primer set (Geno primers) had an intronic primer; the cDNA expression primer set (Exp primers) had an intron-spanning primer in the *TH* exon. (B-E) Pre-natal paternally-skewed transcription of *TH* in placental tissue. Sanger sequencing chromatograms showing the presence of (B) the homozygous maternal genotype, (C) the heterozygous SNP in fetal (Fet) gDNA, (D) paternally-skewed expression of *TH* in BOM cDNA and (E) TOM cDNA. (F) Primer and SNP positions for allele-specific expression analysis of *INS*. (G-J) Tissue-specific post-natal paternal transcription of *INS*. Sanger sequencing chromatograms showing the presence of (G) the homozygous maternal genotype, (H) the heterozygous SNP in PY gDNA, (I) paternal expression of *INS* in PY liver cDNA and (J)

biallelic expression of *INS* in PY brain cDNA. (K) Primer and SNP positions for allele-specific expression analysis of *IncINS*. (L-O) Tissue-specific pre-natal paternal transcription of *IncINS* in placental tissue and (P-S) tissue-specific post-natal paternal transcription of *IncINS*. Sanger sequencing chromatograms showing the presence of (L) the homozygous maternal genotype in the endometrial (Endo) tissue, (M) the heterozygous SNP in fetal gDNA, (N) biallelic expression of *IncINS* in BOM cDNA and (O) paternally-skewed expression of *IncINS* in TOM cDNA. Sanger sequencing chromatograms showing the presence of (P) the homozygous maternal genotype, (Q) the heterozygous SNP in PY gDNA, (R) paternal expression of *IncINS* in PY liver cDNA and (S) biallelic expression of *IncINS* in PY brain cDNA.
